# Supplementary material for: Dietary Patterns and Frailty in Older Korean Adults: Results from the Korean Frailty and Aging Cohort Study
Source: PubMed Central journal article supplement (PMC7918700; doi:10.3390/nu13020601), 2021-02-12
Supplement: nutrients-13-00601-s001.pdf [file nutrients-13-00601-s001.pdf]

**Table S1.** Macronutrient intake by tertiles of food group (N=511).

| Variable                       | Seasonings     |                |                | <i>p</i> -Value <sup>a</sup> |
|--------------------------------|----------------|----------------|----------------|------------------------------|
|                                | Tertile 1      | Tertile 2      | Tertile 3      |                              |
| Percent of energy <sup>b</sup> |                |                |                |                              |
| From carbohydrate              | 68.9 ± 8.7     | 66.5 ± 7.8     | 65.5 ± 7.1     | <0.001                       |
| From protein                   | 14.4 ± 2.7     | 15.4 ± 3.0     | 16.1 ± 2.8     | <0.001                       |
| From fat                       | 16.7 ± 7.1     | 18.1 ± 6.1     | 18.3 ± 5.9     | 0.031                        |
| Energy (Kcal/day)              | 1246.0 ± 323.9 | 1425.4 ± 331.2 | 1683.6 ± 408.5 | <0.001                       |

Values are mean ± standard deviation. <sup>a</sup>Analysis of variance for continuous variables. <sup>b</sup>Adequate energy ratio from carbohydrate 55-65%, protein 7-20%, and fat 15-30% in 19 years old or older [26].
